# Supplementary material
Source: PubMed Central journal article supplement (PMC8088608)
Supplement: JB.00631-20-s0001.pdf [file JB.00631-20-s0001.pdf]

**a**

|                                                                                   | Vertical (first)                | Horizontal (second) |   |                                                                                    | Vertical (first) | Horizontal (second)             |   |
|-----------------------------------------------------------------------------------|---------------------------------|---------------------|---|------------------------------------------------------------------------------------|------------------|---------------------------------|---|
|  | W50 <i>porU</i>                 | W50 <i>porU</i>     | - |  | W50 <i>porU</i>  | W50 <i>porU</i>                 | - |
|  | 381 <i>porU<sub>C690A</sub></i> | W50 <i>porU</i>     | - |  | W50 <i>porU</i>  | 381 <i>porU<sub>C690A</sub></i> | - |
|  | W50 <i>porV</i>                 | W50 <i>porU</i>     | - |  | W50 <i>porU</i>  | W50 <i>porV</i>                 | - |
|  | W50 <i>porT</i>                 | W50 <i>porU</i>     | - |  | W50 <i>porU</i>  | W50 <i>porT</i>                 | - |
|  | 33277 <i>porQ</i>               | W50 <i>porU</i>     | - |  | W50 <i>porU</i>  | 33277 <i>porQ</i>               | - |
|  | W50 <i>porZ</i>                 | W50 <i>porU</i>     | - |  | W50 <i>porU</i>  | W50 <i>porZ</i>                 | - |
|  | W50 <i>wbaP</i>                 | W50 <i>porU</i>     | + |  | W50 <i>porU</i>  | W50 <i>wbaP</i>                 | + |

**b**

|                                                                                     | Vertical (first)                | Horizontal (second)             |   |                                                                                      | Vertical (first)                | Horizontal (second)             |   |
|-------------------------------------------------------------------------------------|---------------------------------|---------------------------------|---|--------------------------------------------------------------------------------------|---------------------------------|---------------------------------|---|
|  | W50 <i>porU</i>                 | 381 <i>porU<sub>C690A</sub></i> | - |  | 381 <i>porU<sub>C690A</sub></i> | W50 <i>porU</i>                 | - |
|  | 381 <i>porU<sub>C690A</sub></i> | 381 <i>porU<sub>C690A</sub></i> | - |  | 381 <i>porU<sub>C690A</sub></i> | 381 <i>porU<sub>C690A</sub></i> | - |
|  | W50 <i>porV</i>                 | 381 <i>porU<sub>C690A</sub></i> | - |  | 381 <i>porU<sub>C690A</sub></i> | W50 <i>porV</i>                 | - |
|  | W50 <i>porT</i>                 | 381 <i>porU<sub>C690A</sub></i> | - |  | 381 <i>porU<sub>C690A</sub></i> | W50 <i>porT</i>                 | - |
|  | 33277 <i>porQ</i>               | 381 <i>porU<sub>C690A</sub></i> | - |  | 381 <i>porU<sub>C690A</sub></i> | 33277 <i>porQ</i>               | - |
|  | W50 <i>porZ</i>                 | 381 <i>porU<sub>C690A</sub></i> | - |  | 381 <i>porU<sub>C690A</sub></i> | W50 <i>porZ</i>                 | - |
|  | W50 <i>wbaP</i>                 | 381 <i>porU<sub>C690A</sub></i> | + |  | 381 <i>porU<sub>C690A</sub></i> | W50 <i>wbaP</i>                 | + |

**c**

|                                                                                   | Vertical<br>(first)                 | Horizontal<br>(second) |   |
|-----------------------------------------------------------------------------------|-------------------------------------|------------------------|---|
|  | W50 <i>porU</i>                     | W50 <i>porV</i>        | - |
|  | 381<br><i>porU</i> <sub>C690A</sub> | W50 <i>porV</i>        | - |
|  | W50 <i>porV</i>                     | W50 <i>porV</i>        | - |
|  | W50 <i>porT</i>                     | W50 <i>porV</i>        | - |
|  | 33277 <i>porQ</i>                   | W50 <i>porV</i>        | - |
|  | W50 <i>porZ</i>                     | W50 <i>porV</i>        | - |
|  | W50 <i>wbaP</i>                     | W50 <i>porV</i>        | + |

|                                                                                    | Vertical<br>(first) | Horizontal<br>(second)              |   |
|------------------------------------------------------------------------------------|---------------------|-------------------------------------|---|
|  | W50 <i>porV</i>     | W50 <i>porU</i>                     | - |
|  | W50 <i>porV</i>     | 381<br><i>porU</i> <sub>C690A</sub> | - |
|  | W50 <i>porV</i>     | W50 <i>porV</i>                     | - |
|  | W50 <i>porV</i>     | W50 <i>porT</i>                     | - |
|  | W50 <i>porV</i>     | 33277 <i>porQ</i>                   | - |
|  | W50 <i>porV</i>     | W50 <i>porZ</i>                     | - |
|  | W50 <i>porV</i>     | W50 <i>wbaP</i>                     | + |

**d**

|                                                                                     | Vertical<br>(first)                 | Horizontal<br>(second) |   |
|-------------------------------------------------------------------------------------|-------------------------------------|------------------------|---|
|  | W50 <i>porU</i>                     | W50 <i>porT</i>        | - |
|  | 381<br><i>porU</i> <sub>C690A</sub> | W50 <i>porT</i>        | - |
|  | W50 <i>porV</i>                     | W50 <i>porT</i>        | - |
|  | W50 <i>porT</i>                     | W50 <i>porT</i>        | - |
|  | 33277 <i>porQ</i>                   | W50 <i>porT</i>        | - |
|  | W50 <i>porZ</i>                     | W50 <i>porT</i>        | - |
|  | W50 <i>wbaP</i>                     | W50 <i>porT</i>        | + |

|                                                                                      | Vertical<br>(first) | Horizontal<br>(second)              |   |
|--------------------------------------------------------------------------------------|---------------------|-------------------------------------|---|
|  | W50 <i>porT</i>     | W50 <i>porU</i>                     | - |
|  | W50 <i>porT</i>     | 381<br><i>porU</i> <sub>C690A</sub> | - |
|  | W50 <i>porT</i>     | W50 <i>porV</i>                     | - |
|  | W50 <i>porT</i>     | W50 <i>porT</i>                     | - |
|  | W50 <i>porT</i>     | 33277 <i>porQ</i>                   | - |
|  | W50 <i>porT</i>     | W50 <i>porZ</i>                     | - |
|  | W50 <i>porT</i>     | W50 <i>wbaP</i>                     | + |

**e**

|                                                                                   | Vertical (first)                | Horizontal (second) |          |                                                                                    | Vertical (first)  | Horizontal (second)             |          |
|-----------------------------------------------------------------------------------|---------------------------------|---------------------|----------|------------------------------------------------------------------------------------|-------------------|---------------------------------|----------|
|  | W50 <i>porU</i>                 | 33277 <i>porQ</i>   | -        |  | 33277 <i>porQ</i> | W50 <i>porU</i>                 | -        |
|  | 381 <i>porU<sub>C690A</sub></i> | 33277 <i>porQ</i>   | -        |  | 33277 <i>porQ</i> | 381 <i>porU<sub>C690A</sub></i> | -        |
|  | W50 <i>porV</i>                 | 33277 <i>porQ</i>   | -        |  | 33277 <i>porQ</i> | W50 <i>porV</i>                 | -        |
|  | W50 <i>porT</i>                 | 33277 <i>porQ</i>   | -        |  | 33277 <i>porQ</i> | W50 <i>porT</i>                 | -        |
|  | 33277 <i>porQ</i>               | 33277 <i>porQ</i>   | -        |  | 33277 <i>porQ</i> | 33277 <i>porQ</i>               | -        |
|  | W50 <i>porZ</i>                 | 33277 <i>porQ</i>   | -        |  | 33277 <i>porQ</i> | W50 <i>porZ</i>                 | -        |
|  | W50 <i>wbaP</i>                 | 33277 <i>porQ</i>   | <b>W</b> |  | 33277 <i>porQ</i> | W50 <i>wbaP</i>                 | <b>W</b> |

**f**

|                                                                                     | Vertical (first)                | Horizontal (second) |          |                                                                                      | Vertical (first) | Horizontal (second)             |          |
|-------------------------------------------------------------------------------------|---------------------------------|---------------------|----------|--------------------------------------------------------------------------------------|------------------|---------------------------------|----------|
|  | W50 <i>porU</i>                 | W50 <i>porZ</i>     | -        |  | W50 <i>porZ</i>  | W50 <i>porU</i>                 | -        |
|  | 381 <i>porU<sub>C690A</sub></i> | W50 <i>porZ</i>     | -        |  | W50 <i>porZ</i>  | 381 <i>porU<sub>C690A</sub></i> | -        |
|  | W50 <i>porV</i>                 | W50 <i>porZ</i>     | -        |  | W50 <i>porZ</i>  | W50 <i>porV</i>                 | -        |
|  | W50 <i>porT</i>                 | W50 <i>porZ</i>     | -        |  | W50 <i>porZ</i>  | W50 <i>porT</i>                 | -        |
|  | 33277 <i>porQ</i>               | W50 <i>porZ</i>     | -        |  | W50 <i>porZ</i>  | 33277 <i>porQ</i>               | -        |
|  | W50 <i>porZ</i>                 | W50 <i>porZ</i>     | -        |  | W50 <i>porZ</i>  | W50 <i>porZ</i>                 | -        |
|  | W50 <i>wbaP</i>                 | W50 <i>porZ</i>     | <b>W</b> |  | W50 <i>porZ</i>  | W50 <i>wbaP</i>                 | <b>W</b> |

**g**

|                                                                                   | Vertical (first)                 | Horizontal (second) |   |                                                                                    | Vertical (first) | Horizontal (second)              |   |
|-----------------------------------------------------------------------------------|----------------------------------|---------------------|---|------------------------------------------------------------------------------------|------------------|----------------------------------|---|
|  | W50 <i>porU</i>                  | W50 <i>wbaP</i>     | + |  | W50 <i>wbaP</i>  | W50 <i>porU</i>                  | + |
|  | 381 <i>porU</i> <sub>C690A</sub> | W50 <i>wbaP</i>     | + |  | W50 <i>wbaP</i>  | 381 <i>porU</i> <sub>C690A</sub> | + |
|  | W50 <i>porV</i>                  | W50 <i>wbaP</i>     | + |  | W50 <i>wbaP</i>  | W50 <i>porV</i>                  | + |
|  | W50 <i>porT</i>                  | W50 <i>wbaP</i>     | + |  | W50 <i>wbaP</i>  | W50 <i>porT</i>                  | + |
|  | 33277 <i>porQ</i>                | W50 <i>wbaP</i>     | W |  | W50 <i>wbaP</i>  | 33277 <i>porQ</i>                | W |
|  | W50 <i>porZ</i>                  | W50 <i>wbaP</i>     | W |  | W50 <i>wbaP</i>  | W50 <i>porZ</i>                  | W |
|  | W50 <i>wbaP</i>                  | W50 <i>wbaP</i>     | - |  | W50 <i>wbaP</i>  | W50 <i>wbaP</i>                  | - |

**Supplementary Fig. 1 Reciprocal cross overs of two strains**

First strain was applied vertically and the second strain applied in one horizontal motion from left to right on BHI-T BA plate and incubated 14 days anaerobically. Reciprocal crosses between (a) W50 *porU* and one of seven strains (W50 *porU*, 381 *porU*<sub>C690A</sub>, W50 *porV*, W50 *porT*, 33277 *porQ*, W50 *porZ*, W50 *wbaP*); (b) 381 *porU*<sub>C690A</sub>; (c) W50 *porV*; (d) W50 *porT*; (e) 33277 *porQ*; (f) W50 *porZ*; (g) W50 *wbaP*. +, obvious pigmentation; W, weak pigmentation; -, no pigmentation.

RgpB\_33277 MKKNFSRIVSIVAFSSLLGGMAFAQPAERGRNPQVRLLSAEQSMSKVQFRMDNLQFTDVQ 60  
RgpB\_381 MKKNFSRIVSIVAFSSLLGGMAFAQPAERGRNPQVRLLSAEQSMSKVQFRMDNLQFTDVQ 60  
\*\*\*\*\*

RgpB\_33277 TSKGVAQVPTFTTEGVNISEKGTPIILPILSRSLAVSETRAMKVEVSSKFIKKDVLIAPS 120  
RgpB\_381 TSKGVAQVPTFTTEGVNISEKGTPIILPILSRSLAVSETRAMKVEVSSKFIKKDVLIAPS 120  
\*\*\*\*\*

RgpB\_33277 KGVISRAENPDQIPYVYGQSYNEDKFFPGEIATLSDPFILRDVRGQVVNFAPLQYNPVTK 180  
RgpB\_381 KGVISRAENPDQIPYVYGQSYNEDKFFPGEIATLSDPFILRDVRGQVVNFAPLQYNPVTK 180  
\*\*\*\*\*

RgpB\_33277 TLRIYTEIVVAVSETAEAGQNTISLVKNSTFTGFEDIYKSVFMNYEATRYTPVEEKENGR 240  
RgpB\_381 TLRIYTEIVVAVSETAEAGQNTISLVKNSTFTGFEDIYKSVFMNYEATRYTPVEEKENGR 240  
\*\*\*\*\*

RgpB\_33277 MIVIVAKKYEGDIKDFVDWKNQRGLRTEVKAEDIASPVTANAIQQFVKQEYEKEGNDLT 300  
RgpB\_381 MIVIVAKKYEGDIKDFVDWKNQRGLRTEVKAEDIASPVTANAIQQFVKQEYEKEGNDLT 300  
\*\*\*\*\*

RgpB\_33277 YVLLVGDHKDIPAKITPGIKSDQVYGQIVGNDHYNEVFIGRFSCESKEDLKTQIDRTIHY 360  
RgpB\_381 YVLLVGDHKDIPAKITPGIKSDQVYGQIVGNDHYNEVFIGRFSCESKEDLKTQIDRTIHY 360  
\*\*\*\*\*

RgpB\_33277 ERNITTEDKWLQALCIASAEGGPSADNGESDIQHENVIANLLTQYGYTKI IKCYDPGVT 420  
RgpB\_381 ERNITTEDKWLQALCIASAEGGPSADNGESDIQHENVIANLLTQYGYTKI IKCYDPGVT 420  
\*\*\*\*\*

RgpB\_33277 PKNIIDAFNGGISLVNYTGHGSETAWGTSHFGTTHVKQLTNSNQLPFIFDVACVNGDFLF 480  
RgpB\_381 PKNIIDAFNGGISLVNYTGHGSETAWGTSHFGTTHVKQLTNSNQLPFIFDVACVNGDFLF 480  
\*\*\*\*\*

RgpB\_33277 SMPCFAEALMRAQKDKGKPTGTVAIIASTINQSWASPMRGQDEMNEILCEKHPNNIKRTFG 540  
RgpB\_381 SMPCFAEALMRAQKDKGKPTGTVAIIASTIDQYWAPPMRGQDEMNEILCEKHPNNIKRTFG 540  
\*\*\*\*\* : \* \* \*\*\*\*\*

```

RgpB_33277    GVTMNGMFAMVEKYKKDGEKMLDTWTVFGDPSLLVRLTLVPTEMQVTAPANISASAQTFEV 600
RgpB_381     GVTMNGMFAMVEKYKKDGENMLDTWTVFGDPSLLVRLTLVPTEMQVTAPANISASAQTFEV 600
*****:*****

RgpB_33277    ACDYNGAIATLSDDGDMVGTAIVKDGKAI I KLNESIADETNLTLTVVGYNKVTVIKDVKV 660
RgpB_381     ACDYNGAIATLSDDGDMVGTAIVKDGKAI I KLNESIADETNLTLTVVGYNKVTVIKDVKV 660
*****

RgpB_33277    EGTSIADVANDKPYTVAVSGKTIITVESPAAGLTIFDMNGRRVATAKNRMVFEAQNGVYAV 720
RgpB_381     EGTSIADVANDKPYTVAVSGKTIITVESPAAGLTIFDMNGRRVATAKNRMVFEAQNGVYAV 720
*****

RgpB_33277    RIATEGKTYTEKVIVK 736
RgpB_381     RIATEGKTYTEKVIVK 736
*****

```

**Supplementary Fig. 2 Alignment of RgpB protein sequences from strains 33277 and 381**

Protein sequence alignment for RgpB from 33277 and 381 strains was generated by the Clustal Omega program from EMBL-EBI Web Services (<https://www.ebi.ac.uk/Tools/msa/clustalo/>). Yellow highlighted amino acids indicate sequence mismatches between the two strain sequences. Underlined peptides represent strain-specific RgpB tryptic peptides (three for 33277 and two for 381).

**Supplementary Table 1** Unique peptide sequences for the same regions of RgpB between 33277 and 381 strains<sup>a</sup>

| Peptide ID <sup>b</sup> | Sequence <sup>c</sup>      | RgpB  |     | RgpA  |     |
|-------------------------|----------------------------|-------|-----|-------|-----|
|                         |                            | 33277 | 381 | 33277 | 381 |
| 1                       | K/DGEK/MLDTWTVFGDPSLLVR    | x     |     | x     | x   |
| 1*                      | K/DGEN MLDTWTVFGDPSLLVR    |       | x   |       |     |
| 9                       | K/DGKPTGTVAIIASTINQSWASPMR | x     |     | x     | x   |
| 9*                      | K/DGKPTGTVAIIASTIDQYWAPPMR |       | x   |       |     |

<sup>a</sup>A “x” represents that the peptide is present.

<sup>b</sup>Peptide ID numbers “1” and “9” correspond to the RgpA/B peptides shown in **Fig. 5**. Numbers with an asterisk are peptides unique to RgpB from strain 381.

<sup>c</sup>Highlighted amino acid residues indicate a mismatch in the same region of RgpB between 33277 and 381 strains.
